# Supplementary material
Source: HighWire-hosted journal article supplement (https://bjsm.bmj.com/content/51/11/895)
Supplement: inline-supplementary-material-3 [file inline-supplementary-material-3.docx]

Supplement 3 PRISMA Flow Diagrams

Table 1. ADULT SCAT PRISMA Flow Diagram


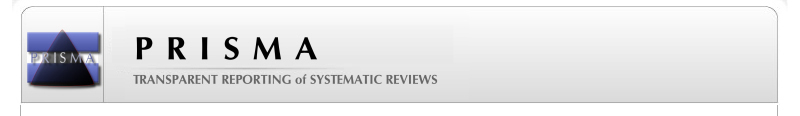


**SCAT Searches Conducted**July 24-25, 2016

**Database Results**

Medline = 93 Embase = 182

PsycINFO = 67 CINAHL = 44

Cochrane CRCT = 5 SportDiscus = 54

Cochrane DSR = 0

**Number of Duplicate Records**

N = 174

Full-text articles excluded, with reasons
(n = 22)

Abstract only=2; Conference Proceeding=14;

Non-sports population=1

Unavailable=5

Studies included in quantitative synthesis (meta-analysis)
(n = 0 )

Studies included in qualitative synthesis
(n = 21 )

Full-text articles assessed for eligibility
(n = 43)

Records excluded
(n = 228 )

Records screened
(n = 271 )

Records after duplicates removed
(n = 271)

Additional records identified through other sources
(n = 0 )

## Identification

## Eligibility

## Included

## Screening

Records identified through database searching
(n = 445 )

Supplement 3

Table 2. Child SCAT PRISMA Flow Diagram


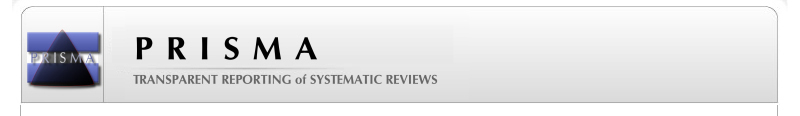
**PRISMA 2009 Flow Diagram**

**CHILD SCAT Searches Conducted**August 4, 2016

**Database Results**

Medline = 350 Embase = 540

PsycINFO = 171 CINAHL = 135

Cochrane CRCT = 20 SportDiscus = 61

Cochrane DSR = 2

**Number of Duplicate Records**

N = 533

Studies included in qualitative synthesis
(n = 32 )

Full-text articles excluded,
(n = 26 )

Full-text articles assessed for eligibility
(n = 58 )

Records excluded
(n = 688 )

Records screened
(n =746 )

Records after duplicates removed
(n =746)

Additional records identified through other sources
(n = 0 )

## Identification

## Eligibility

## Included

## Screening

Records identified through database searching
(n = 1279)

Supplement 3

Table 3 Sideline PRISMA Flow Diagram


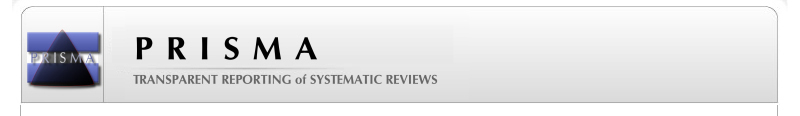
**PRISMA 2009 Flow Diagram**

**SIDELINE Searches Conducted**September 16-18, 2016

**Database Results**

Medline = 316 Embase = 776

PsycINFO = 175 CINAHL = 602

Cochrane CRCT = 123 SportDiscus = 302

Cochrnae DSR = 27

**Number of Duplicate Records**

N = 606

Full-text articles excluded, with reasons
(n =7):

Inappropriate population (n=2)

Not a sideline assessment (n=5)

Studies included in quantitative synthesis (meta-analysis)
(n =0)

Studies included in qualitative synthesis
(n =21 )

Full-text articles assessed for eligibility
(n = 28)

Records excluded
(n =1687)

Records screened
(n =1715)

Records after duplicates removed
(n = 1715)

Additional records identified through other sources
(n =0)

## Identification

## Eligibility

## Included

## Screening

Records identified through database searching
(n = 2321)

Supplement 3

Table 4 Video/Observer PRISMA Flow Diagram


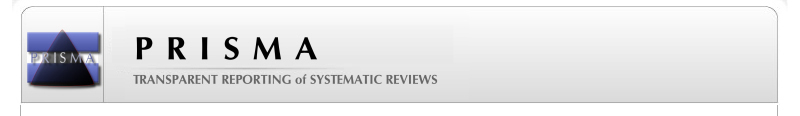
**PRISMA 2009 Flow Diagram**

**VIDEO / OBSERVER Searches Conducted**July 24-25, 2016

**Database Results**

Medline = 163 Embase = 233

PsycINFO = 56 CINAHL = 99

Cochrane CRCT = 6 SportDiscus = 118

Cochrane DSR = 8

**Number of Duplicate Records**

N = 257

Studies included in quantitative synthesis (meta-analysis)
(n = )

Studies included in qualitative synthesis
(n =8 )

Full-text articles assessed for eligibility
(n =20 )

Records excluded
(n = 405 )

Records screened
(n = 425 )

Records after duplicates removed
(n = 425)

Additional records identified through other sources
(n =0 )

## Identification

## Eligibility

## Included

## Screening

Records identified through database searching
(n = 682 )

Full-text articles excluded, with reasons
(n = 12 )

-Did not assess clinical signs (12)

Supplement 3

Table 5 Oculomotor PRISMA Flow Diagram


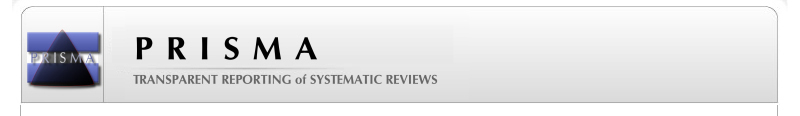
**PRISMA 2009 Flow Diagram**

**Oculomotor Searches Conducted**August 24, 2016

**Database Results**

PubMed = 193 Embase = 148

SportDiscus = 13

**Number of Duplicate Records**

N = 154

**Oculomotor tests: Sullivan/Leddy**

Full-text articles excluded
(n = 4)

Oculomotor testing not performed during or immediately after contest

Studies included in quantitative synthesis (meta-analysis)
(n = NA)

Studies included in qualitative synthesis
(n = 14)

Full-text articles assessed for eligibility
(n = 18)

Records excluded
(n = 182)

Records screened
(n = 200)

Records after duplicates removed
(n = 200)

Additional records identified through other sources
(n = 0)

## Identification

## Eligibility

## Included

## Screening

Records identified through database searching
(n = 354)
